# Supplementary material for: Ni2O3–Au+hybrid active sites on NiOx@Au ensembles for low-temperature gas-phase oxidation of alcohols
Source: Royal Society of Chemistry journal article supplement (doi:10.1039/c2cy20579c), 2012-10-23
Supplement: c2cy20579c.pdf [file c2cy20579c.pdf]

## Electronic Supplementary Information

### **Ni<sub>2</sub>O<sub>3</sub>-Au<sup>+</sup> Hybrid Active-Sites on NiO<sub>x</sub>@Au Ensembles for Low-Temperature Gas-phase Oxidation of Alcohols**

Guofeng Zhao<sup>a</sup>, Huanyun Hu<sup>a</sup>, Wei Chen<sup>a</sup>, Zheng Jiang<sup>b</sup>, Shuo Zhang<sup>b</sup>, Jun Huang<sup>\*,c</sup>, Yong Lu<sup>\*,a</sup>

(<sup>a</sup> Shanghai Key Laboratory of Green Chemistry and Chemical Processes, Department of Chemistry, East China Normal University, 3663 North Zhongshan Road, Shanghai 200062, China

<sup>b</sup> Shanghai Synchrotron Radiation Facility, Shanghai Institute of Applied Physics, Chinese Academy of Sciences, Shanghai 201204, China

<sup>c</sup> School of Chemical and Biomolecular Engineering, University of Sydney, NSW 2006, Australia)

Fax: (+86)21-62233424, Email: [ylu@chem.ecnu.edu.cn](mailto:ylu@chem.ecnu.edu.cn); [jun.huang@sydney.edu.au](mailto:jun.huang@sydney.edu.au))

## Materials and Methods

### *Catalyst preparation*

Sinter-locked three-dimensional microfibrinous networks consisting of 5 vol% 8- $\mu\text{m}$  Ni-fibers (or 8- $\mu\text{m}$  Ti-fibers) and 95 vol% void volume were built using regular papermaking/sintering processes.<sup>S1-S6</sup> The Ni-fiber was manufactured by Western Metal Material Co., Ltd., Xi'an, China, and Ti-fiber (8  $\mu\text{m}$  dia.) was purchased from IntraMicron, Ltd. (USA). Five grams of Ni-fiber (or Ti-fibers) chops (2-3 mm length) and 1.5 g of cellulose fibers were added to water (1 L) and vigorously stirred to produce a uniform suspension. The resulting suspension was transferred into the head box of a 159 mm diameter circular sheet former (ZCX-159A, Changchun, China), and a 159 mm circular preform was then formed by draining and drying in air. The preform paper was oxidized in air at 500 °C to remove the cellulosic binders and subsequently sintered in hydrogen at 950 °C to create the three-dimensional sinter-locked networks.

**NiO<sub>x</sub>@Au/Ni-fiber:** Gold was first galvanically deposited on this sinter-locked Ni-fiber ( $\text{Ni} + \text{HAuCl}_4 \rightarrow \text{Au} + \text{NiCl}_2$ ,  $\varphi(\text{Au}^{3+}/\text{Au}^0) - \varphi(\text{Ni}^{2+}/\text{Ni}^0) = 1.5 - (-0.25) = 1.75$  eV) by incipiently impregnating it with an aqueous solution containing the specified amount of  $\text{HAuCl}_4$  at room temperature. The resulting sample were dried overnight at 80 °C and calcined in air at 300 °C for 2 h to obtain the fresh Au/Ni-fiber catalyst. Then, the catalyst was pre-activated over the gas-phase oxidation of benzyl alcohol at 380 °C for 1 h using the molar ratio of  $\text{O}_2$  to alcoholic hydroxyl molar ratio ( $\text{O}_2/\text{hydroxyl}$ ) = 0.6 and weight hourly space velocity (WHSV) = 20  $\text{h}^{-1}$ . During the pre-activated process, the  $\text{NiCl}_2$  was transformed into  $\text{NiO}_x$  ( $\text{NiO}_x$  (assuming all is  $\text{NiO}$ ) loading is calculated to be 2.4 wt% according to the galvanic reaction between Ni-fiber and  $\text{HAuCl}_4$ ), which partially cover the gold particles to form the active

NiO<sub>x</sub>@Au ensembles. Finally, the pre-activated catalyst NiO<sub>x</sub>@Au/Ni-fiber was obtained.

**Au/Ni-fiber-W, Au/Ti-fiber and Au/NiO-Ni-fiber:** These model catalysts were prepared by incipiently impregnating the corresponding sintered-fibers with aqueous solution containing appointed amount of HAuCl<sub>4</sub> at room temperature. The catalyst Au/Ni-fiber-W was obtained by washing the as-prepared catalyst Au/Ni-fiber using deionized water to remove the produced NiCl<sub>2</sub> (from the reaction: HAuCl<sub>4</sub> + Ni → Au + NiCl<sub>2</sub>) just after galvanic reaction and before drying. The catalyst Au/NiO-Ni-fiber was prepared using the Ni-fibers (calcined at 600 °C in air for 2 h). All the resulting samples were dried at 80 °C overnight and calcined at 300 °C for 2h in air and these samples were named as fresh samples.

**NiO<sub>x</sub>/Ni-fiber, NiO<sub>x</sub>@Au/Ni-fiber-W, NiO<sub>x</sub>/Ti-fiber, NiO<sub>x</sub>@Au/Ti-fiber, NiO<sub>x</sub>@Au/NiO-Ni-fiber:** The five model catalysts were prepared by incipiently impregnating the corresponding sintered-fibers (Ni-fiber and Ti-fiber) and samples (Au/Ni-fiber-W, Au/Ti-fiber and Au/NiO-Ni-fiber) with aqueous solution containing appointed amount of Ni(NO<sub>3</sub>)<sub>2</sub> (Sinopharm Chemical Reagent Co. Ltd, China) at room temperature. All the resulting samples were dried at 80 °C overnight and calcined at 300 °C for 2h in air and these samples were named as fresh samples.

The activated samples (or working samples) were obtained by pre-activating the fresh samples at 380 °C for 1h in reaction steam of benzyl alcohol (Sinopharm Chemical Reagent Co. Ltd, China) using the molar ratio of O<sub>2</sub> to alcoholic hydroxyl molar ratio (O<sub>2</sub>/hydroxyl) = 0.6 and weight hourly space velocity (WHSV) = 20 h<sup>-1</sup>.

### **Characterization**

The X-ray powder diffraction (XRD) patterns were measured on a Rigaku Ultima IV diffractometer

with Cu K $\alpha$  radiation at an acceleration voltage of 40 kV. The catalysts were also characterized by a transmission electron microscope (TEM, JEOL-JEM-2010 instrument at 200 kV). X-ray photoelectron spectra (XPS) were recorded on a VG EscaLab 220i spectrometer using a standard Al K $\alpha$  X-ray source (300 W) and an analyzer pass energy of 20 eV. All binding energies were referenced to the adventitious C1s line at 284.9 eV. X-ray absorption fine structure (XAFS) data of the Ni K-edge (8,333 eV) and Au L<sup>III</sup>-edge (11,919 eV) were collected in the transmission mode on the BL14W1 beamline of the Shanghai Synchrotron Radiation Facility (SSRF). The typical electron beam energy was 3.5 GeV, and the current was 300 mA. A cryogenically cooled double-crystal Si(111) monochromator was used to minimize the harmonics. The XAFS spectra were analyzed by the NSRLXAFS 3.0 package according to standard procedures.<sup>S7</sup> The experimental backscattering amplitude and phase shift for the Au-Au pair were extracted from the Au foil.

Gold loading of the typical NiO<sub>x</sub>@Au/Ni-fiber was determined to be 3.8 wt% by inductively coupled plasma atomic emission spectrometry (ICP-AES) on a Thermo Scientific iCAP 6300 ICP spectrometer. As for the Ni-content, the support fiber is pure metal nickel. It should be noted that the NiO<sub>x</sub>@Au ensembles rather than Au@Ni-fiber contributed to the low-temperature oxidation of alcohols. Therefore, the NiO<sub>x</sub>-content of the NiO<sub>x</sub>@Au ensembles can be the representative Ni-content of the catalyst. The NiO<sub>x</sub>-content can be estimated according to the galvanic reaction between Ni-fiber and HAuCl<sub>4</sub> ( $3\text{Ni} + 2\text{HAuCl}_4 = 2\text{HCl} + 3\text{NiCl}_2 + 2\text{Au}$ ). The produced NiCl<sub>2</sub> was further transformed into NiO<sub>x</sub> during the pre-activation period at 380 °C. Three moles of NiCl<sub>2</sub>/NiO<sub>x</sub> were produced with the formation of two mole of Au. It indicates that 3.8 wt% of Au-content related to the NiCl<sub>2</sub> content of 4.2 wt% and the NiO<sub>x</sub> (assuming all is NiO) content of 2.4 wt%.

### ***Reactivity tests***

The gas-phase selective oxidation of alcohols on these catalysts with molecular oxygen was performed on a fixed-bed quartz tube reactor (700 mm length by 16 mm inner diameter) under atmospheric pressure as described previously.<sup>S5,S6,S8</sup> Circular chips (16.1 mm diameter) of the microfibrinous-structured catalysts were punched down from their large sheet sample and packed layer-up-layer into the tube reactor. The catalyst used in testing experiments is 0.3 g, corresponding to a bed thickness of 5 mm. Notice that the 0.1 mm larger diameter than the inner diameter of the tubular reactor was deliberately retained to avoid the appearance of a gap between the reactor wall and the edges of the catalyst chips, thereby preventing gas bypass. Alcohols were continuously fed with the speed of 6 g/h using a high-performance liquid pump in parallel with O<sub>2</sub> (oxidant of 13.6 ml/min) and N<sub>2</sub> (diluted gas of 100 ml/min) feeding using calibrated mass flow controllers into the reactor heated to the desired reaction temperature. WHSV was calculated by dividing the mass flow rate of alcohol feedstock by the catalyst mass. The effluent was cooled using an ice-salt bath (-15 °C) to liquefy the condensable vapors for analysis using an HP 5890 gas chromatography-flame ionization detector (GC-FID) with a 60 m HP-5ms capillary column. The gas-phase products, such as H<sub>2</sub>, CO<sub>x</sub>, and C1-C3 hydrocarbons, were analyzed using an HP-5890 GC with thermal conductivity detector (TCD) and a 30 m AT-plot 300 capillary column.

## Supplementary Figures and Tables

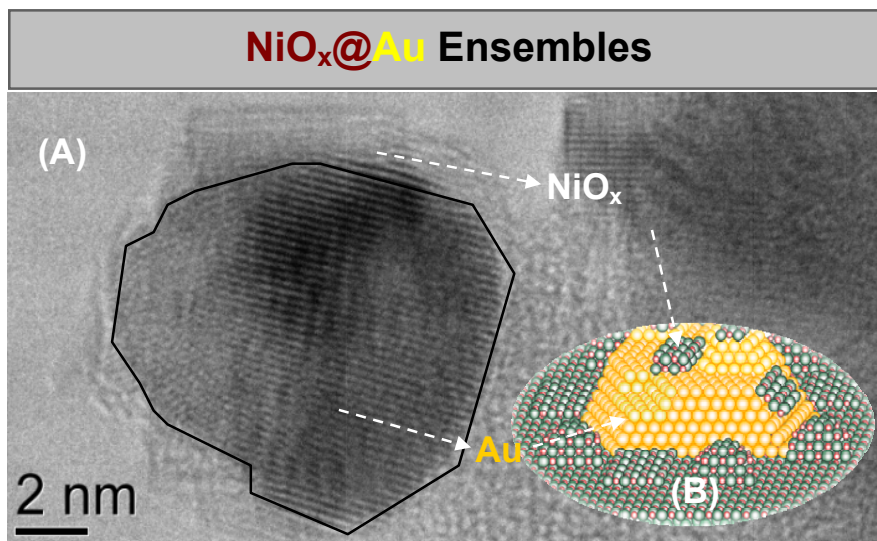

**Fig. S1.** Structure and model of the active NiO<sub>x</sub>@Au ensembles, with NiO<sub>x</sub> segments partially covering large gold particles to form the ensembles. (A) TEM image of the active NiO<sub>x</sub>@Au ensembles over the pre-activated NiO<sub>x</sub>@Au/Ni-fiber catalyst; (B) Structural illustration of the partial coverage of Au particles with NiO<sub>x</sub> segments. Pre-activation conditions: undergoing benzyl alcohol oxidation at 380 °C for 1 h using O<sub>2</sub>/ol = 0.6 and WHSV = 20 h<sup>-1</sup>.

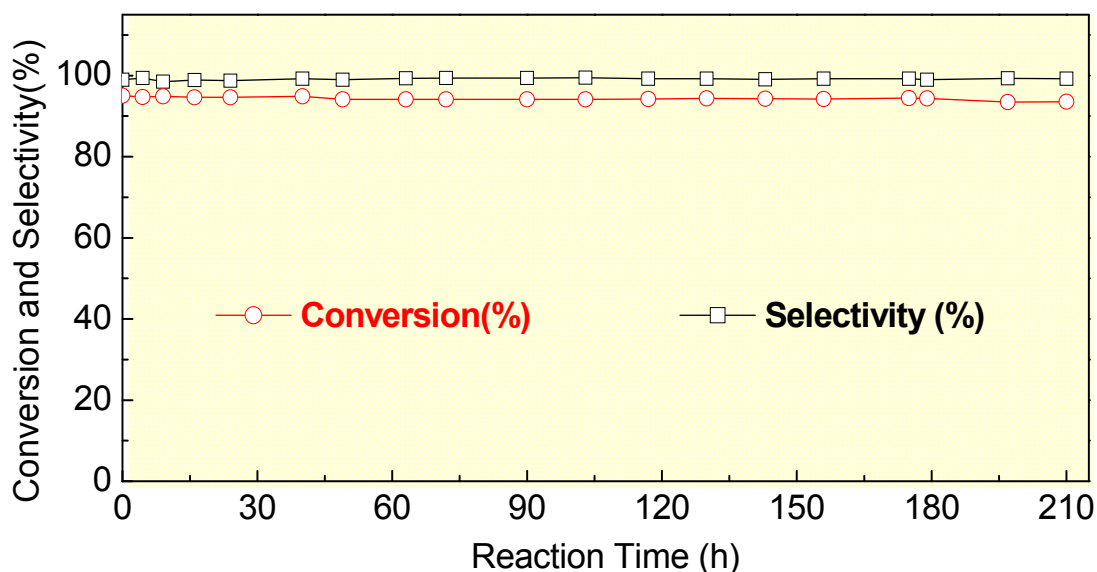

**Fig. S2.** Longer-term test over the pre-activated catalyst NiO<sub>x</sub>@Au/Ni-fiber in the gas-phase oxidation of benzyl alcohol. Reaction conditions: 250 °C, O<sub>2</sub>/hydroxyl = 0.6, WHSV = 20 h<sup>-1</sup>. Pre-activation conditions: pre-activating the fresh samples at 380 °C for 1h in reaction steam of benzyl alcohol using O<sub>2</sub>/hydroxyl = 0.6 and WHSV = 20 h<sup>-1</sup>. **Note:** In the whole process, 1.2 kg of benzyl alcohol was consumed. The average benzyl alcohol conversion and benzaldehyde selectivity is 93% and 99.2%, respectively, and the 0.8% selectivity is contributed to toluene (0.05%) and benzoic acid (0.75%). Therefore, the ideal and actual mass of the product based on the above conversion and selectivity is 1352.4 and 1350.2 g, respectively. Therefore, the mass balance is about 99.9%. In order to determine the experimental error of the conversion and selectivity, every product sample was analyzed by GC for 5 times, and the error is in the range of ±0.2%.

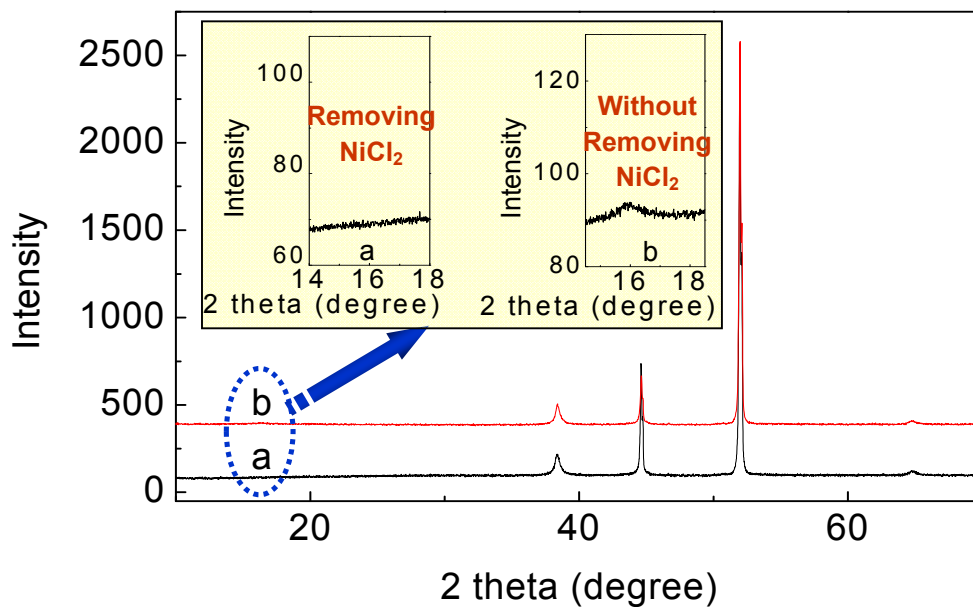

**Fig. S3.** XRD patterns of the Au/Ni-fiber catalysts (Au loading of 4 wt%) with NiCl<sub>2</sub> and without NiCl<sub>2</sub>. (a) Removing NiCl<sub>2</sub> by washing the samples for 5 times using deionized water before drying and calcining (*i.e.*, just after galvanic exchange reaction); (b) Without removing NiCl<sub>2</sub>. **Insert-a:** showing no NiCl<sub>2</sub> peak at  $2\theta = 16^\circ$ ; **Insert-b:** showing the NiCl<sub>2</sub> peak at  $2\theta = 16^\circ$ .



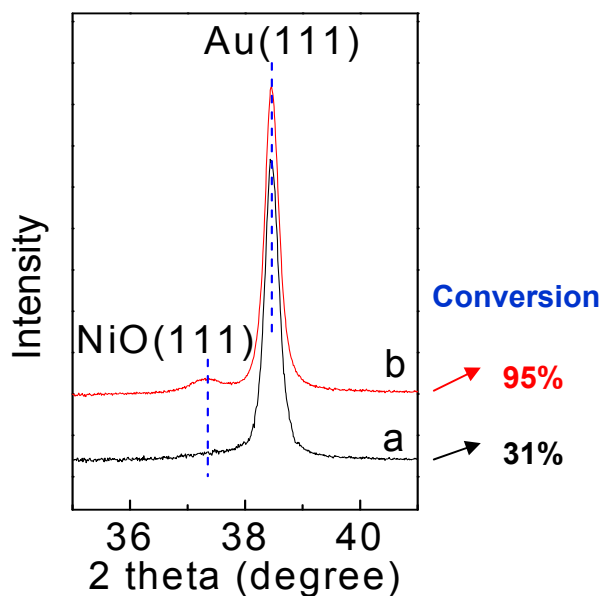

**Fig. S4.** XRD patterns of the pre-activated Au/Ni-fiber catalyst (Au loading of 4 wt%) with NiO<sub>x</sub> and without NiO<sub>x</sub>. (a) With the presence of NiO<sub>x</sub>; (b) Removing NiO<sub>x</sub> from the catalyst. Pre-activation and reaction conditions: the same as in Fig. S1.

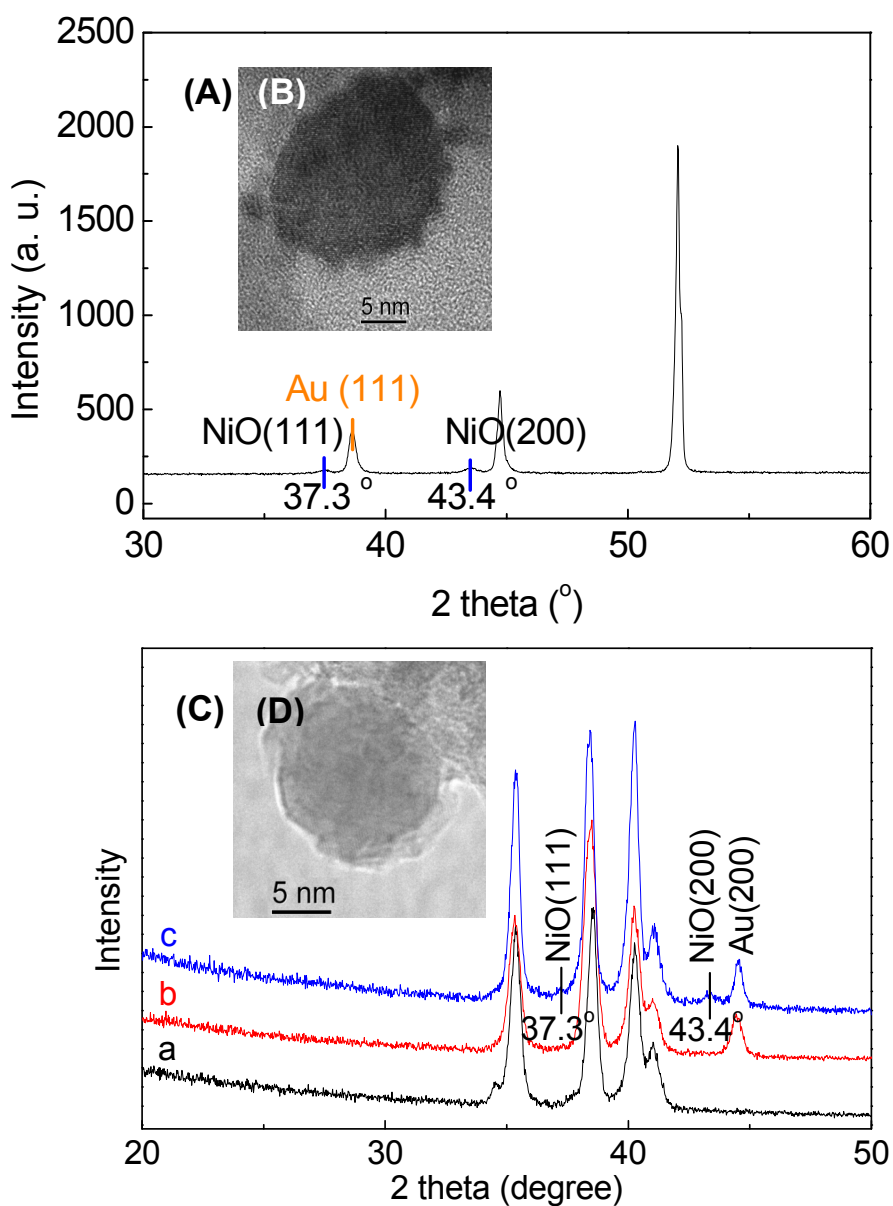

**Fig. S5.** The formation of the active NiO<sub>x</sub>@Au ensembles over the catalysts NiO<sub>x</sub>@Au/Ni-fiber-W and NiO<sub>x</sub>@Au/Ti-fiber. XRD pattern (A) and TEM image (B) of the catalyst NiO<sub>x</sub>@Au/Ni-fiber-W; XRD pattern (C) and TEM image (D) of the catalyst NiO<sub>x</sub>@Au/Ti-fiber: (a) pure sinter-locked Ti-microfiber, (b) the pre-activated Au/Ti-fiber, and (c) the pre-activated NiO<sub>x</sub>@Au/Ti-fiber. Pre-activation conditions: undergoing benzyl alcohol oxidation at 380 °C for 1 h using O<sub>2</sub>/ol = 0.6 and WHSV = 20 h<sup>-1</sup>.

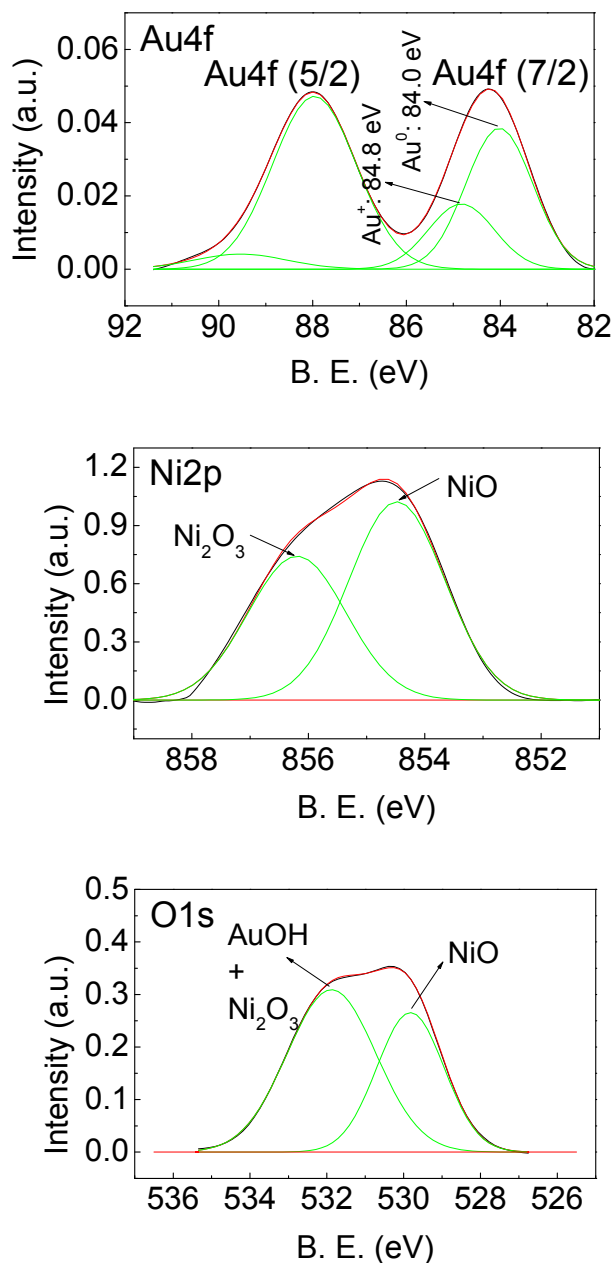

**Fig. S6.** XPS spectra in Au4f and Ni2p regions for the pre-activated NiO<sub>x</sub>@Au/Ni-fiber catalyst. Coexistence of Au<sup>0</sup> together with Au<sup>+</sup>, Ni<sup>2+</sup> (NiO), and Ni<sup>3+</sup> (Ni<sub>2</sub>O<sub>3</sub>) supports the partial coverage structure of the active NiO<sub>x</sub>@Au ensembles.

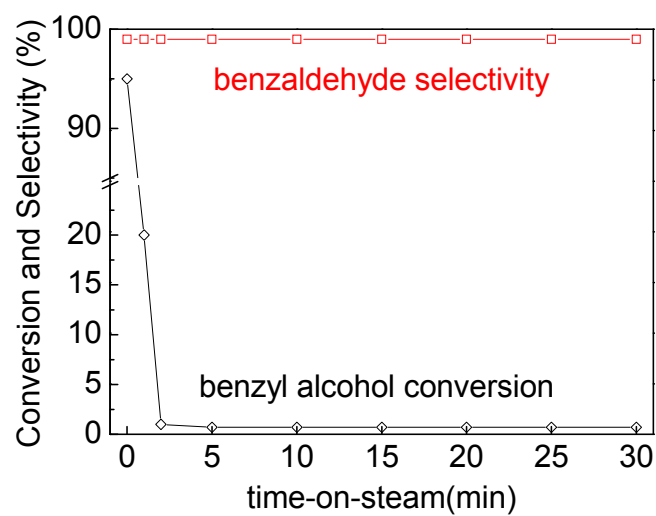

**Fig. S7.** The catalytic performance of the pre-activated NiO<sub>x</sub>@Au/Ni-fiber over benzyl alcohol in the absence of O<sub>2</sub> at 250 °C with WHSV of 20 h<sup>-1</sup>.

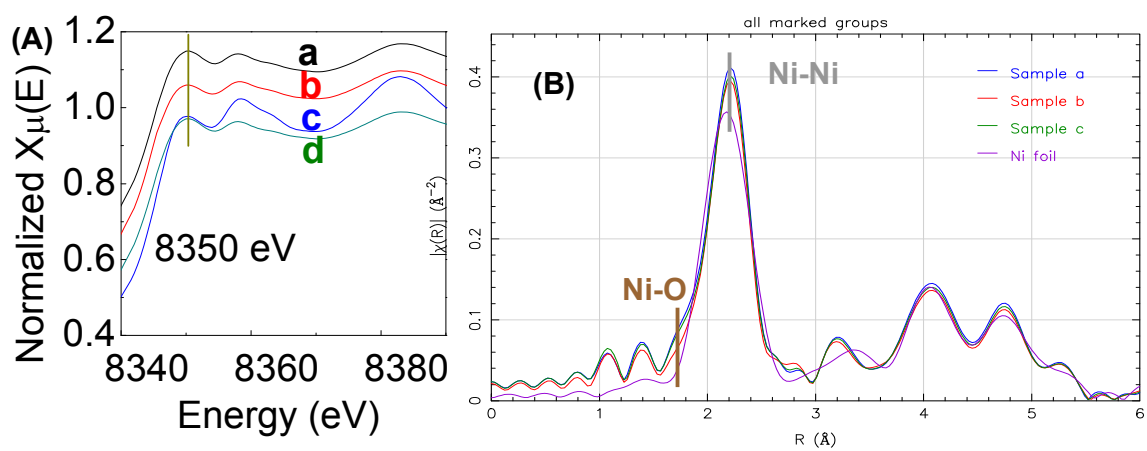

**Fig. S8.** Ni K-edge XANES (A) and modulus of the Fourier-transform (B) of Ni K edge signal. (a) The working catalyst NiO<sub>x</sub>@Au/Ni-fiber; (b) The working sample after undergoing reaction with benzyl alcohol in the absence of O<sub>2</sub> at 250 °C for 0.5h (called exhausted catalyst); (c) Ni foil; (d) The exhausted catalyst catalyzing benzyl alcohol by re-feeding O<sub>2</sub> under the same conditions as in (a). Reaction conditions: same as in Fig. S1.

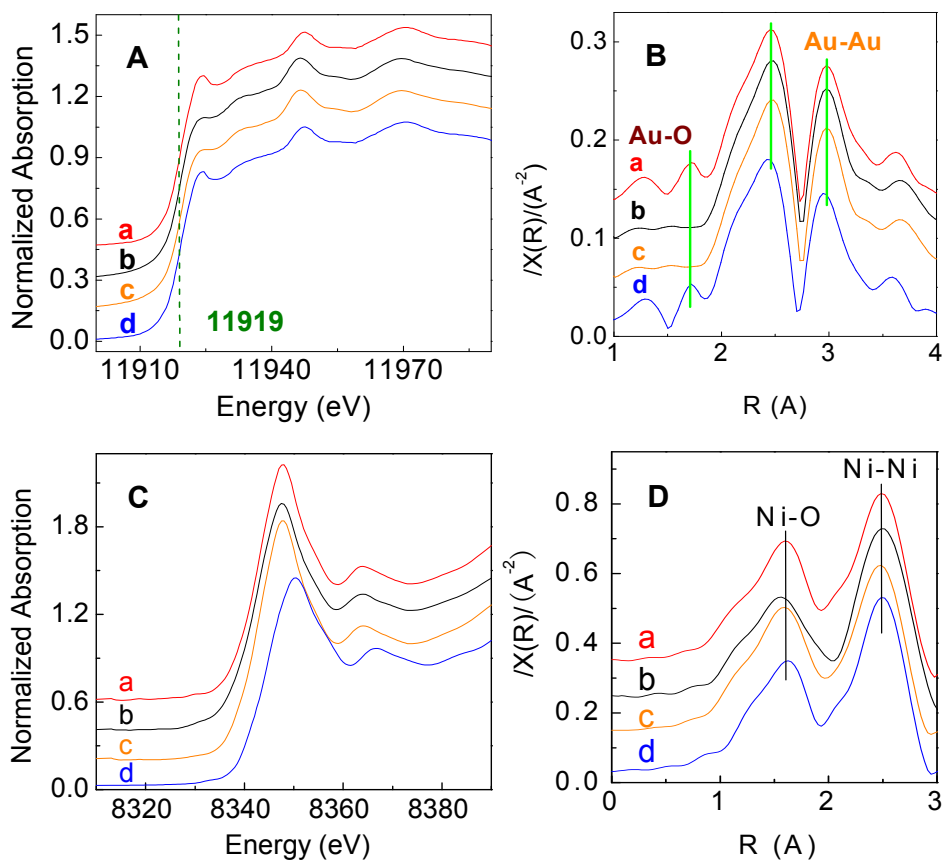

**Fig. S9.** XANES of Au L<sub>3</sub> edge (A) and modulus of the Fourier-transform of Au L<sub>3</sub> edge signal (B), and XANES of Ni K-edge (C) and modulus of the Fourier-transform of Ni K edge signal (D) of several catalysts. (A-B): (a) The working catalyst NiO<sub>x</sub>@Au/Ti-fiber after undergoing reaction with benzyl alcohol in the presence of O<sub>2</sub> at 250 °C for 0.5h; (b) The working sample after undergoing reaction with benzyl alcohol in the absence of O<sub>2</sub> at 250 °C for 0.5h (called exhausted catalyst); (c) Au foil; (d) The exhausted catalyst catalyzing benzyl alcohol by re-feeding O<sub>2</sub> under the same conditions as in (a). (C-D): (a) The same sample as in A-a; (b) The same sample as in A-b; (c) The same sample as in A-d; (d) Pure NiO.

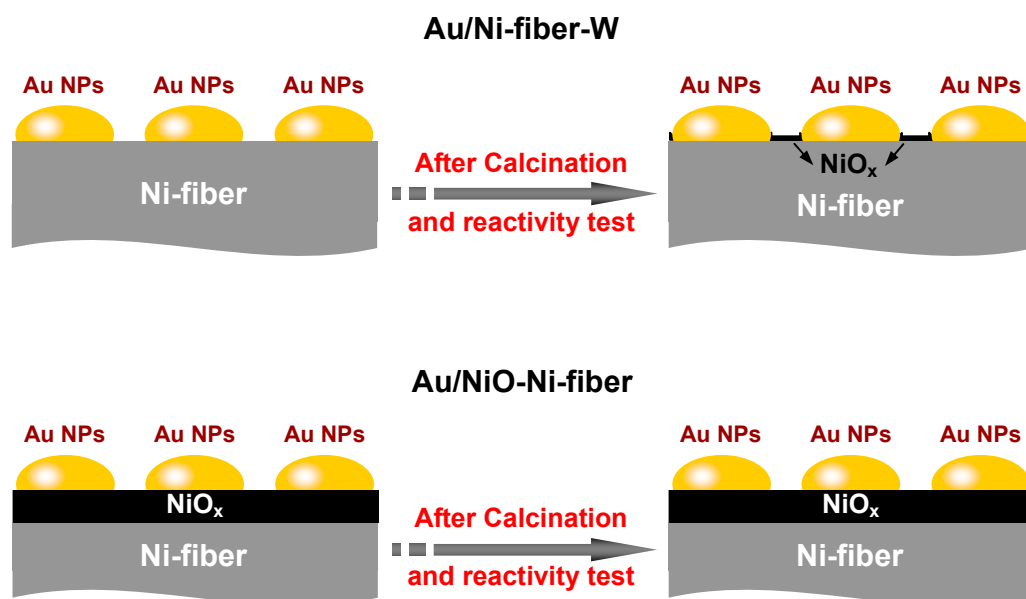

**Scheme S1.** Schematic illustration of the formation of a NiO<sub>x</sub> circumference at the interface between Au-particles and fibrous support over the catalysts Au/Ni-fiber-W and Au/NiO-Ni-fiber (the same samples as in Table 1 (Entries 2 & 8, respectively) in manuscript) after calcination and reactivity test. The catalysts were pre-activated by undergoing the gas-phase oxidation of benzyl alcohol at 380 °C for 1 h using O<sub>2</sub>/hydroxyl = 0.6 and WHSV = 20 h<sup>-1</sup>, and then were tested at 250 °C using O<sub>2</sub>/hydroxyl = 0.6 and WHSV = 20 h<sup>-1</sup>.

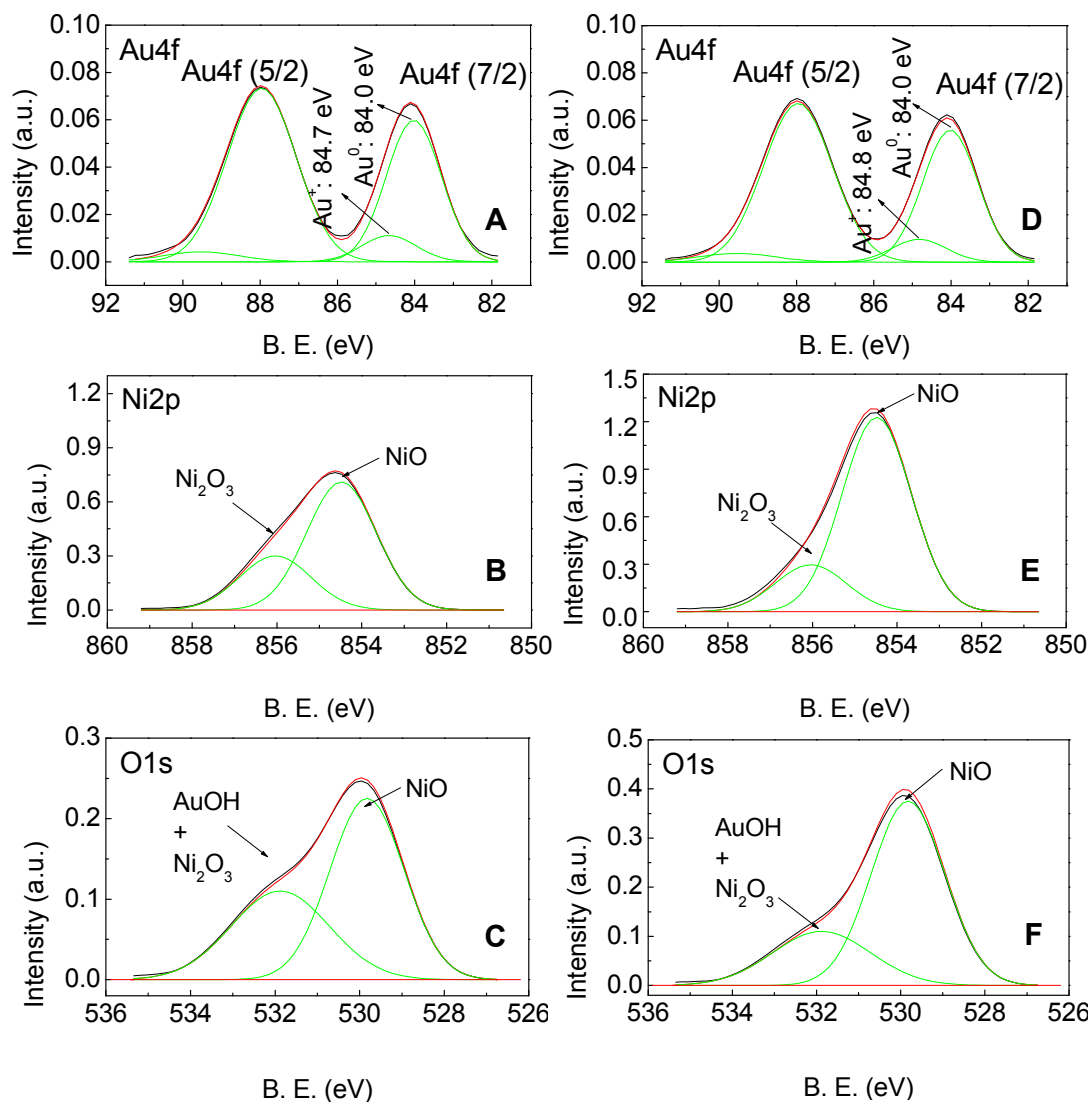

**Fig. S10.** XPS spectra in Au4f (A,D), Ni2p (B,E), and O1s (C,F) regions for the Au/Ni-fiber-W (A-C) and Au/NiO-Ni-fiber (D-F) catalysts (the same samples as in Table 1 (Entries 2 & 8, respectively) in manuscript) after reactivity test. The catalysts were pre-activated by undergoing the gas-phase oxidation of benzyl alcohol at 380 °C for 1 h using  $O_2/\text{hydroxyl} = 0.6$  and  $\text{WHSV} = 20 \text{ h}^{-1}$ , and then were tested at 250 °C using  $O_2/\text{hydroxyl} = 0.6$  and  $\text{WHSV} = 20 \text{ h}^{-1}$ .



**Table S1.** The turnover frequency (TOF) of benzyl alcohol oxidation over various catalysts. <sup>a</sup>

| Catalysts                                      | $V_{\text{total}}$<br>( $\text{cm}^3$ ) <sup>b</sup> | $D_{\text{Au}}$<br>(nm) <sup>c</sup> | $V_{\text{Au-particle}}$<br>( $\text{nm}^3$ ) <sup>d</sup> | Amount of<br>Au particles | $S_{\text{Au-particle}}$<br>( $\text{nm}^2$ ) <sup>d</sup> | $S_{\text{total}}$<br>( $\text{cm}^2$ ) | Surface Au<br>Atoms <sup>e</sup> | Conv.<br>(%) <sup>f</sup> | Converted<br>Benzyl Alcohol <sup>g</sup> | TOF   |
|------------------------------------------------|------------------------------------------------------|--------------------------------------|------------------------------------------------------------|---------------------------|------------------------------------------------------------|-----------------------------------------|----------------------------------|---------------------------|------------------------------------------|-------|
| $\text{NiO}_x@/\text{Au}/\text{Ni}$ -fiber     | 0.000609                                             | 25                                   | 4090                                                       | $1.49 \times 10^{14}$     | 982                                                        | 1462                                    | $1.86 \times 10^{18}$            | 95                        | $3.18 \times 10^{22}$                    | 17097 |
| $\text{Au}/\text{SiO}_2$                       | 0.000609                                             | 27                                   | 5153                                                       | $1.18 \times 10^{14}$     | 1145                                                       | 1351                                    | $1.72 \times 10^{18}$            | 6                         | $0.2 \times 10^{22}$                     | 1156  |
| $\text{Au}/\text{Ni}$ -fiber-W                 | 0.000609                                             | 25                                   | 4090                                                       | $1.49 \times 10^{14}$     | 982                                                        | 1462                                    | $1.86 \times 10^{18}$            | 31                        | $1.04 \times 10^{22}$                    | 5591  |
| $\text{NiO}_x/\text{Ni}$ -fiber                | ---                                                  | ---                                  | ---                                                        | ---                       | ---                                                        | ---                                     | ---                              | 6                         | ---                                      | ---   |
| $\text{NiO}_x@/\text{Au}/\text{Ni}$ -fiber-W   | 0.000609                                             | 25                                   | 4090                                                       | $1.49 \times 10^{14}$     | 982                                                        | 1462                                    | $1.86 \times 10^{18}$            | 93                        | $3.11 \times 10^{22}$                    | 16720 |
| $\text{Au}/\text{Ti}$ -fiber                   | 0.000609                                             | 30                                   | 7069                                                       | $0.86 \times 10^{14}$     | 1414                                                       | 1216                                    | $1.55 \times 10^{18}$            | 4                         | $0.13 \times 10^{22}$                    | 839   |
| $\text{NiO}_x/\text{Ti}$ -fiber                | ---                                                  | ---                                  | ---                                                        | ---                       | ---                                                        | ---                                     | ---                              | 5                         | ---                                      | ---   |
| $\text{NiO}_x@/\text{Au}/\text{Ti}$ -fiber     | 0.000609                                             | 27                                   | 5153                                                       | $1.18 \times 10^{14}$     | 1145                                                       | 1351                                    | $1.72 \times 10^{18}$            | 92                        | $3.08 \times 10^{22}$                    | 17907 |
| $\text{Au}/\text{NiO}$ -Ni-fiber               | 0.000609                                             | 24                                   | 3619                                                       | $1.68 \times 10^{14}$     | 905                                                        | 1522                                    | $1.94 \times 10^{18}$            | 30                        | $1.00 \times 10^{22}$                    | 5155  |
| $\text{NiO}_x@/\text{Au}/\text{NiO}$ -Ni-fiber | 0.000609                                             | 24                                   | 3619                                                       | $1.68 \times 10^{14}$     | 905                                                        | 1522                                    | $1.94 \times 10^{18}$            | 93                        | $3.11 \times 10^{22}$                    | 16031 |

<sup>a</sup> For all the catalysts, the gold loading is 4.0 wt%, and 0.3 g catalyst was used in testing experiments; <sup>b</sup> The total volume of gold ( $V_{\text{total}} = 0.000609 \text{ cm}^3$ ) was calculated as: gold mass ( $0.3 \text{ g} \times 0.04 = 0.012 \text{ g}$ ) was divided by the gold density ( $19.7 \text{ g/cm}^3$ ); <sup>c</sup> The particle size was estimated from XRD patterns using Scherrer's equation; <sup>d</sup> The gold particles were assumed as hemisphere, and the volume of single gold particle is  $\pi D_{\text{Au}}^3/12$ , and the surface area is  $\pi D_{\text{Au}}^2/2$ ; <sup>e</sup> The distance between the adjacent gold atoms is 0.28 nm, and one Au atom occupies the surface area of 0.0784 ( $0.28 \times 0.28 = 0.0784$ )  $\text{nm}^2$ ; <sup>f</sup> The weight hourly space velocity (WHSV) =  $20 \text{ h}^{-1}$ , and 6 g benzyl alcohol was fed into the reactor per hour; <sup>g</sup> Take the converted benzyl alcohol over the catalyst  $\text{NiO}_x@/\text{Au}/\text{Ni}$ -fiber as example: the converted benzyl alcohol in one hour is 5.7 g ( $0.95 \times 6 = 5.7 \text{ g}$ ), and the converted amount of benzyl alcohol molecule is  $0.318 \times 10^{23}$  ( $5.7 \text{ (g)} / 108 \text{ (g/mol)} = 0.0528 \text{ mol}$ ;  $0.0528 \times 6.02 \times 10^{23} = 0.318 \times 10^{23}$ ).

**Table S2.** The XPS results of several catalysts.

| Catalyst                                 | Compound type                  | B. E. (eV) | Peak Area | Fraction (%) |
|------------------------------------------|--------------------------------|------------|-----------|--------------|
| Sample 1<br>(working catalyst)           | <b>O-1s</b>                    |            |           |              |
|                                          | NiO                            | 529.7      | 678       | 42           |
|                                          | Ni <sub>2</sub> O <sub>3</sub> | 531.8      | 936       | 58           |
|                                          | <b>Au-4f</b>                   |            |           |              |
|                                          | Au <sup>0</sup>                | 84.0       | 84        | 69           |
|                                          | Au <sup>+</sup>                | 84.8       | 38        | 31           |
|                                          | Au <sup>3+</sup>               | 86.2       | 0         | 0            |
|                                          | <b>Ni-2p</b>                   |            |           |              |
|                                          | NiO                            | 854.4      | 2107      | 57           |
|                                          | Ni <sub>2</sub> O <sub>3</sub> | 856.2      | 1665      | 43           |
| Sample 2<br>(exhausted catalyst)         | <b>O-1s</b>                    |            |           |              |
|                                          | NiO                            | 529.7      | 940       | 57           |
|                                          | Ni <sub>2</sub> O <sub>3</sub> | 531.8      | 700       | 43           |
|                                          | <b>Au-4f</b>                   |            |           |              |
|                                          | Au <sup>0</sup>                | 84.0       | 116       | 98.3         |
|                                          | Au <sup>+</sup>                | 84.8       | 2         | 1.7          |
|                                          | Au <sup>3+</sup>               | 86.3       | 0         | 0            |
|                                          | <b>Ni-2p</b>                   |            |           |              |
|                                          | NiO                            | 854.4      | 2500      | 67           |
|                                          | Ni <sub>2</sub> O <sub>3</sub> | 856.2      | 1260      | 33           |
| Sample 3<br>(re-feeding O <sub>2</sub> ) | <b>O-1s</b>                    |            |           |              |
|                                          | NiO                            | 529.7      | 700       | 41           |
|                                          | Ni <sub>2</sub> O <sub>3</sub> | 531.8      | 1000      | 59           |
|                                          | <b>Au-4f</b>                   |            |           |              |
|                                          | Au <sup>0</sup>                | 84.0       | 83        | 67           |
|                                          | Au <sup>+</sup>                | 84.8       | 40        | 33           |
|                                          | Au <sup>3+</sup>               | 86.3       | 0         | 0            |
|                                          | <b>Ni-2p</b>                   |            |           |              |
|                                          | NiO                            | 854.4      | 2170      | 58           |
|                                          | Ni <sub>2</sub> O <sub>3</sub> | 856.2      | 1630      | 42           |

Reaction conditions: 250°C, O<sub>2</sub>/hydroxyl = 0.6, WHSV = 20 h<sup>-1</sup>. Pre-activation conditions: pre-activating the fresh samples at 380 °C for 1h in reaction steam of benzyl alcohol using O<sub>2</sub>/hydroxyl = 0.6 and WHSV = 20 h<sup>-1</sup>. **Sample 1:** the working NiO<sub>x</sub>@Au/Ni-fiber; **Sample 2:** The sample 1 underwent the gas-phase reaction of benzyl alcohol with the absence of O<sub>2</sub> for 0.5h, and the obtained sample was called the exhausted catalyst; **Sample 3:** Sample 2 catalyzed benzyl alcohol oxidation by re-feeding O<sub>2</sub> again under the same conditions as for Sample 1.

**Table S3** The conversion of benzyl alcohol over several catalysts.

| Samples                               | O <sub>2</sub> /ol | Conversion (%) | Selectivity (%) |
|---------------------------------------|--------------------|----------------|-----------------|
| Sample 1 (working catalyst)           | 0.6                | 95             | 99              |
| Sample 2 (exhausted catalyst)         | 0                  | 0.7            | 99              |
| Sample 3 (re-feeding O <sub>2</sub> ) | 0.6                | 92             | 99              |

Reaction conditions: 250°C, O<sub>2</sub>/hydroxyl = 0.6, WHSV = 20 h<sup>-1</sup>. Pre-activation conditions: pre-activating the fresh samples at 380 °C for 1h in reaction steam of benzyl alcohol using O<sub>2</sub>/hydroxyl = 0.6 and WHSV = 20 h<sup>-1</sup>. **Sample 1**: the working NiO<sub>x</sub>@Au/Ni-fiber; **Sample 2**: The sample 1 underwent the gas-phase reaction of benzyl alcohol in the absence of O<sub>2</sub> for 0.5h, and the obtained sample was called the exhausted catalyst; **Sample 3**: Sample 2 catalyzed benzyl alcohol oxidation by re-feeding O<sub>2</sub> again under the same conditions as for Sample 1.

**Table S4.** The XPS results of the Au/Ni-fiber-W and Au/NiO-Ni-fiber catalysts.

| Catalyst        | Compound type                  | B. E. (eV) | Peak Area | Fraction (%) |
|-----------------|--------------------------------|------------|-----------|--------------|
| Au/Ni-fiber-W   | <b>O-1s</b>                    |            |           |              |
|                 | NiO                            | 529.7      | 696       | 63           |
|                 | Ni <sub>2</sub> O <sub>3</sub> | 531.8      | 370       | 37           |
|                 | <b>Au-4f</b>                   |            |           |              |
|                 | Au <sup>0</sup>                | 84.0       | 101       | 88           |
|                 | Au <sup>+</sup>                | 84.7       | 14        | 12           |
|                 | Au <sup>3+</sup>               | 86.2       | 0         | 0            |
|                 | <b>Ni-2p</b>                   |            |           |              |
|                 | NiO                            | 854.4      | 1576      | 73           |
|                 | Ni <sub>2</sub> O <sub>3</sub> | 856.2      | 601       | 27           |
| Au/NiO-Ni-fiber | <b>O-1s</b>                    |            |           |              |
|                 | NiO                            | 529.7      | 1235      | 76           |
|                 | Ni <sub>2</sub> O <sub>3</sub> | 531.8      | 390       | 24           |
|                 | <b>Au-4f</b>                   |            |           |              |
|                 | Au <sup>0</sup>                | 84.0       | 97        | 88           |
|                 | Au <sup>+</sup>                | 84.8       | 13        | 12           |
|                 | Au <sup>3+</sup>               | 86.3       | 0         | 0            |
|                 | <b>Ni-2p</b>                   |            |           |              |
|                 | NiO                            | 854.4      | 2950      | 83           |
|                 | Ni <sub>2</sub> O <sub>3</sub> | 856.2      | 585       | 17           |

The Au/Ni-fiber-W and Au/NiO-Ni-fiber catalysts are the same samples as in Table 1 (Entries 2 & 8, respectively) in manuscript after calcination and reactivity test. Reaction conditions: 250°C, O<sub>2</sub>/hydroxyl = 0.6, WHSV = 20 h<sup>-1</sup>. Pre-activation conditions: pre-activating the fresh samples at 380 °C for 1h in reaction steam of benzyl alcohol using O<sub>2</sub>/hydroxyl = 0.6 and WHSV = 20 h<sup>-1</sup>.

## Supplementary Discussion 1: The formation of the Au@NiO ensembles

The sinter-locked Ni-microfiber was heated in air at 600 °C for 2 h prior to loading Au. The H<sub>2</sub>AuCl<sub>4</sub>-Ni galvanic exchange reaction almost didn't take place due to the formation of bulk NiO (Fig. SD1). Although there may be a reaction between H<sub>2</sub>AuCl<sub>4</sub> and NiO ( $H^+ + NiO = Ni^{2+} + H_2O$ ), the reaction is too trivial to be considered, which could be confirmed by the absence of NiCl<sub>2</sub> (XRD patterns not shown). Therefore, the active ensembles of the catalyst Au/NiO-Ni-fiber can be determined as Au@NiO.

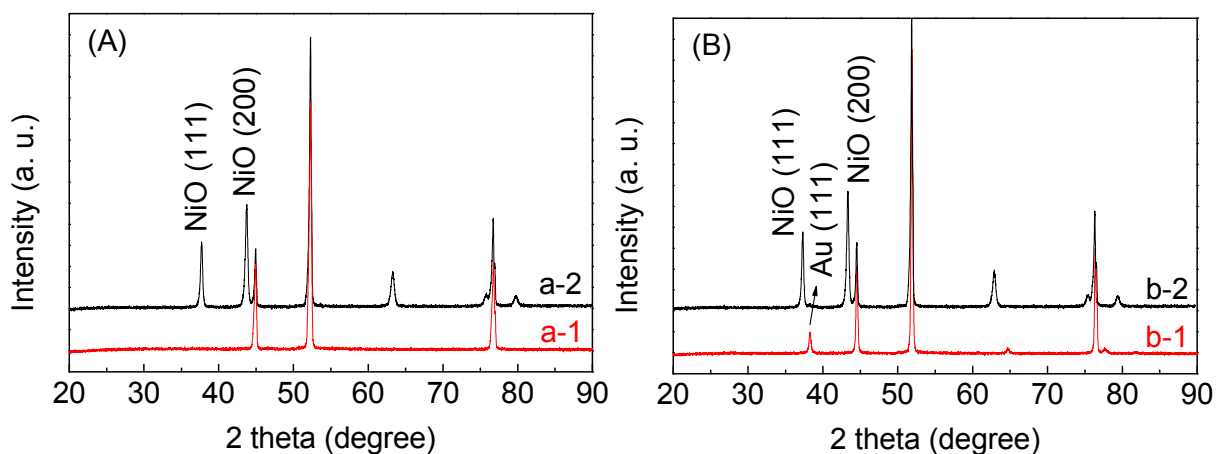

**Fig. SD1.** XRD patterns of the sinter-locked Ni-microfiber and the catalyst samples. (A) a-1: pure sinter-locked Ni-microfiber; a-2: pure sinter-locked Ni-microfiber treated in air at 600 °C for 2 h; (B) b-1: the as-prepared catalyst Au/Ni-fiber prepared on pure sinter-locked Ni-microfiber (same sample of a-1) just after galvanic reaction before drying and calcining; b-2: the as-prepared catalyst Au/NiO-Ni-fiber (gold loading of 4 wt%) prepared on the treated sinter-locked Ni-microfiber (same sample of a-2) just after galvanic reaction before drying and calcining.

## Supplementary Discussion 2: The analysis of XPS data

For the working NiO<sub>x</sub>@Au/Ni-fiber, the surface atom ratio of O<sub>(531.8eV)</sub>/Ni<sub>(856.2eV)</sub> was quantitatively determined using the following calculations. Firstly, the Ni<sup>2+</sup>/Ni<sup>3+</sup> ratio can be obtained from the Ni 2p peak areas of NiO and Ni<sub>2</sub>O<sub>3</sub>, which are 2107 and 1665, respectively. The Ni<sup>2+</sup>/Ni<sup>3+</sup> ratio is 57:43 (2107:1665), and the O<sub>NiO</sub>/O<sub>Ni<sub>2</sub>O<sub>3</sub></sub> ratio is 42:58 (678:936). The total surface atom ratio of Ni/O is 42:49.4, which was given by the XPS total scanning data. Therefore, the surface O<sub>(531.8eV)</sub>/Ni<sub>(856.2eV)</sub> atom ratio is quantitatively determined to be 1.55 ( $[(0.58 \times 49.4)/(0.44 \times 42)] = 1.55$ ).

For the same NiO<sub>x</sub>@Au/Ni-fiber sample after experiencing gas-phase reaction of benzyl alcohol with the absence of O<sub>2</sub> for 0.5h, the surface O<sub>(531.8eV)</sub>/Ni<sub>(856.2eV)</sub> atom ratio was quantitatively determined using the same calculation. The Ni<sup>2+</sup>/Ni<sup>3+</sup> ratio is 66:34, and the O<sub>NiO</sub>/O<sub>Ni<sub>2</sub>O<sub>3</sub></sub> ratio is 57:43. The total surface atom ratio of Ni/O is 42:47. Therefore, the O<sub>(531.8eV)</sub>/Ni<sub>(856.2eV)</sub> atom ratio is quantitatively determined to be 1.46 ( $[(0.43 \times 47)/(0.33 \times 42)] = 1.46$ ), which coincided almost stoichiometrically ( $100\% \times 1.46/1.5 = 97.3\%$ ).

The XPS peaks of NiO and Ni<sub>2</sub>O<sub>3</sub> over the working catalyst NiO<sub>x</sub>@Au/Ni-fiber is 2107 and 1665, respectively, and the whole area of Ni is 3772 (2107 + 1665 = 3772). The XPS peaks of NiO and Ni<sub>2</sub>O<sub>3</sub> over the exhausted catalyst NiO<sub>x</sub>@Au/Ni-fiber is 2500 and 1260, respectively, and the whole area of Ni is 3760 (2500 + 1260 = 3760). Compared the area of XPS peaks of NiO and Ni<sub>2</sub>O<sub>3</sub> over the two samples, it is found that: (1) The whole area of Ni over the two catalysts remains unchanged (3772 v.s. 3760); (2) The peak area of Ni<sub>2</sub>O<sub>3</sub> decreased by 405 from 1665 of the working catalyst to 1260 of the exhausted one; (3) The peak area of NiO increased by 393 from 2107 of the working catalyst to 2500 of the exhausted one; (4) The reduced area of Ni<sub>2</sub>O<sub>3</sub> is almost equal to the increased area of NiO ( $100\% \times 393/405 = 97\%$ ). Therefore, the above results showed that reduced Ni<sub>2</sub>O<sub>3</sub> transformed to NiO.

### Supplementary Discussion 3: The analysis of XAFS data

Because the support of the pre-activated catalyst  $\text{NiO}_x@Au/\text{Ni}$ -fiber is Ni-fiber, so that the  $\text{Ni}_2\text{O}_3/\text{Ni}^0$  molar ratio is very low and the trend of changes of  $\text{Ni}_2\text{O}_3$  content is difficult to be detected. To investigate the difference of the absorption intensity of NiO and  $\text{Ni}_2\text{O}_3$ , another two samples were prepared, including pure NiO and the pre-activated catalyst Au-5-NiO-4/Ti (Au loading of 5 wt%, and NiO loading of 4 wt%).

Clearly, the absorption intensity at 8350 eV of the pre-activated catalyst Au-5-NiO-4/Ti is higher than that of the pure NiO (Fig. SD2A). Additionally, the Ni-O coordination of the pre-activated catalyst is higher than that of the pure NiO (Fig. SD2B). The only difference of Ni state over the two samples is that the  $\text{Ni}_2\text{O}_3$  content of the pre-activated catalyst Au-5-NiO-4/Ti is much higher than that of the pure NiO (detected by XPS, not shown). Therefore, the existence of  $\text{Ni}_2\text{O}_3$  is favorable to increase the absorption intensity of whiteline.

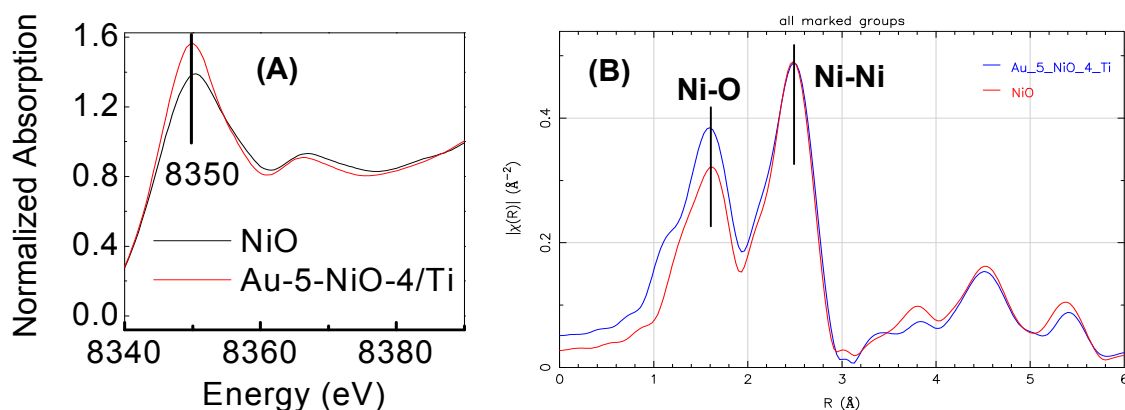

**Fig. SD2.** Ni K-edge XANES (A) and modulus of the Fourier-transform of Ni K-edge signal (B) over pure NiO and the pre-activated catalyst Au-5-NiO-4/Ti (Au loading of 5 wt%, and NiO loading of 4 wt%). Pre-activation conditions: same as in Fig. S1.

The absorption intensity at the energy of 8350 eV of the exhausted catalyst is slightly lower than the

working one, and subsequently increased to the previous level by re-feeding O<sub>2</sub> into the reaction stream.

Combining the XPS results, it could be inferred that the high-low-high change of the absorption intensity at

8350 eV is caused by the high-low-high change of Ni<sub>2</sub>O<sub>3</sub> content.



## References

- [S1] D. K. Harris, D. R. Cahela and B. J. Tatarchuk, *Compos. A: Appl. Sci. Manuf.*, 2001, **32**, 1117.
- [S2] Y. Lu, H. Wang, Y. Liu, Q. S. Xue, L. Chen and M.Y. He, *Lab Chip*, 2007, **7**, 133.
- [S3] F. T. Jiang, Y. Z. Fang, Y. Liu, L. Chen, Q. S. Xue, Y. Lu, J. X. Lu and M. Y. He, *J. Mater. Chem.*, 2009, **19**, 3632.
- [S4] Y. Liu, H. Wang, J. F. Li, Y. Lu, H. H. Wu, Q. S. Xue and L. Chen, *Appl. Catal. A*, 2007, **328**, 77.
- [S5] M. M. Deng, G. F. Zhao, Q. S. Xue, L. Chen and Y. Lu, *Appl. Catal. B*, 2010, **99**, 222.
- [S6] G. F. Zhao, H. Y. Hu, M. M. Deng and Y. Lu, *Chem. Commun.*, 2011, **47**, 9642.
- [S7] B. Lengeler and P. Eisenberger, *Phys. Rev. B*, 1980, **21**, 4507.
- [S8] J. P. Mao, M. M. Deng, L. Chen, Y. Liu and Y. Lu, *AIChE J.*, 2010, **56**, 1545.
